# Supplementary material for: Highly Accessible Atomically Dispersed Fe‐Nx Sites Electrocatalyst for Proton‐Exchange Membrane Fuel Cell
Source: PubMed Central journal article supplement (PMC7927611; doi:10.1002/advs.202002249), 2021-01-29
Supplement: ADVS-8-2002249-s001.pdf [file ADVS-8-2002249-s001.pdf]

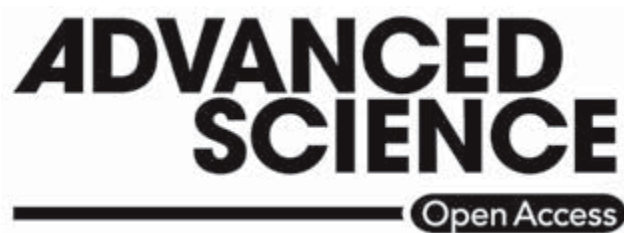

## Supporting Information

for *Adv. Sci.*, DOI: 10.1002/adv.202002249

**Highly accessible atomically dispersed Fe-N<sub>x</sub> sites electrocatalyst for proton-exchange membrane fuel cell**

*Jianing Guo, Bingjie Li\*, Qiyu Zhang, Qingtao Liu, Zelin Wang, Yufei Zhao, Jiangan Shui,\* and Zhonghua Xiang\**

## Supporting Information

### Materials

All reagents were obtained from commercial sources. 2,6-Dichloropurine and N,N-diisopropylethylamine (DIEA) were purchased from Bide Pharmatech Ltd. and J&K, respectively. Tetrahydrofuran (THF) and zinc(II) nitrate hexahydrate ( $\text{Zn}(\text{NO}_3)_2 \cdot 6\text{H}_2\text{O}$ ) were obtained from Beijing Chemical Works. Piperazine and Ferric chloride hexahydrate ( $\text{FeCl}_3 \cdot 6\text{H}_2\text{O}$ ) were purchased from Aladdin. 5% Nafion were obtained from Asta Tech and DuPont. Commercial Pt-based catalyst was supplied by Alfa Aesar Chemical Co.Ltd. High-purity argon and oxygen gas was provided from Beijing AP BAIF Gases Industry Co. Ltd.

### Synthesis

During the synthesis, a wide range of Fe-doped COP was synthesized by tuning the concentration of Zn content in solution. For convenience, the precursors are designated as COP-PD-n, where n is defined as the molar number of Zn content in the starting solution. Here the n value varied from 0 (Zn-free) to 4 mmol. Typically, 1.5 mmol 2,6-Dichloropurine, 3 mmol  $\text{Zn}(\text{NO}_3)_2 \cdot 6\text{H}_2\text{O}$  and 200  $\mu\text{l}$   $\text{FeCl}_3 \cdot 6\text{H}_2\text{O}$  (50 mg/mL) were dissolved in 70 mL THF with ultrasonic. Then the above solution was stirred in an ice bath. When the temperature of the solution dropped to 0 °C, 3 mmol piperazine and 4.25 ml DIEA were added and continued to stir for 4 h at 0 °C. After the temperature of this solution naturally returned to room temperature, the solution was heated to 90 °C and reacted with stirring at this temperature for 12 h. The obtained product was separated by filtration and washed with water. Finally, the product was dried at 60 °C under vacuum for overnight, which was called as COP-PD-3.

The power of COP-PD-n was then transferred into a ceramic boat and placed in a tube furnace. The sample was heated to 975 °C and kept at 975 °C for 2 h under Ar gas. Finally, the sample was naturally cooled to room temperature. The resultant was named as HSAC/Fe-n, where n is molar number of Zn content in the starting solution.

### Physical Characterization

The scanning electron microscopy (SEM) images were taken by using a S-4700 instrument. The high-resolution transmission electron microscopy (HRTEM) images were obtained on a 2100F instrument. The high-angle annular dark-field scanning transmission electron microscopy (HAADFSTEM) images were taken by using a JEM-ARM 300F

scanning/transmission electron microscope operated at 300 kV, equipped with a probe spherical aberration corrector. Powder X-ray diffraction (PXRD) measurements were characterized by D/MAX 2000 X-ray diffractometer with Cu K $\alpha$  line ( $\lambda=1.54178$  Å) as the incident beam. X-ray photoelectron spectroscopy (XPS) analysis was investigated on ThermoVG ESCALAB 250 using Al K $\alpha$  irradiation. Nitrogen adsorption-desorption isotherms were measured by ASAP 2460. FT-IR spectroscopy was performed on an VERTEX 70V instrument with the wavenumber range of 400-4000 cm<sup>-1</sup>. Fe K-edge X-ray absorption spectra were performed on the on the 1W1B-X-ray absorption spectrum experiment stations of Beijing Synchrotron Radiation Facility, China, operated at the energy of 2.5 GeV with an average electron current of 250 mA. A Si (111) double-crystal monochromator was used to reduce the harmonic component of the monochrome beam. The Fe K-edge XANES data were recorded in a transmission mode. Fe foil and Fe<sub>3</sub>O<sub>4</sub> were used as references. The acquired EXAFS raw data were background-subtracted, normalized and Fourier transformed according to the standard procedures with the IFEFFIT software package. The k<sub>3</sub> weighted extended EXAFS oscillation in the range of 3-10.8 Å<sup>-1</sup> was Fourier-transformed (FT). The Solid-state <sup>13</sup>C NMR was performed on a AV300 instrument. The inductively coupled plasma emission spectroscopy (ICP-OES) was performed on ICPS-7500.

### **Electrochemical measurements**

All the electrochemical measurements were carried out in a conventional three-electrode cell using CHI 760E electrochemical workstation controlled equipped with a glassy carbon rotating disk electrode (RDE, 5 mm diameter, PINE instrument Inc.) at room temperature. The electrochemical measurements were conducted in 0.5 M H<sub>2</sub>SO<sub>4</sub> electrolyte using the catalyst modified glassy carbon electrode as the working electrode, saturated calomel electrode (SCE) as the reference electrode and 0.1 cm<sup>2</sup> platinum foil as the counter electrode. All potentials reported in this work were calibrated to the reversible hydrogen electrode (RHE). The typical ink included 5 mg electrocatalyst, 100  $\mu$ L of Nafion solution (0.5 wt.%) and 1 mL of anhydrous ethanol. Subsequently, they were ultrasonic for about 30 minutes to form a homogeneous solution. Then, 25  $\mu$ L of the as-prepared catalyst ink was dropped on a glassy carbon rotating disk electrode giving a loading of 0.57 mg cm<sup>-2</sup>. The commercially carbon-supported Pt/C electrode was prepared according to the above procedure with same loading. Electrolyte (0.5 M H<sub>2</sub>SO<sub>4</sub>) was saturated with high-purity oxygen at room temperature by bubbling O<sub>2</sub> prior to the measurements for at least 30 mins. A flow of O<sub>2</sub> was maintained over the electrolyte during

the test. The working electrode was cycled at least 25 times before the data were recorded at a scan rate  $100 \text{ mV} \cdot \text{s}^{-1}$ . The linear sweep voltammetry (LSV) for ORR was performed at a scan rate of  $5 \text{ mV} \cdot \text{s}^{-1}$  under 1600 rpm.

The electron transfer number and peroxide percentage were tested by the rotating ring disk electrode (RRDE) measurements. The electron transfer number ( $n$ ) was determined by the following equation:

$$n = 4 \times \frac{I_d}{I_d + I_r / N} \quad (\text{SQ1})$$

The ring potential was constant at 1.25 V vs. RHE to reduce  $\text{H}_2\text{O}_2$ . The peroxide percentage ( $\% \text{HO}_2^-$ ) was calculated based on the equation:

$$\% \text{HO}_2^- = 200 \times \frac{I_r / N}{I_d + I_r / N} \quad (\text{SQ2})$$

where  $I_d$  is disk current,  $I_r$  is ring current and  $N = 0.37$  is the current collection efficiency of the Pt ring.

The kinetic current density ( $J_K$ ) was calculated from the Koutecky-Levich equation:

$$\frac{1}{J} = \frac{1}{J_L} + \frac{1}{J_K}$$

where  $J$  is the measured current density,  $J_K$  and  $J_L$  are the kinetic and limiting current densities, respectively.

### MEA Preparation and PEM Fuel Cell Tests

The catalyst was mixed with Nafion solution (5 wt. %), isopropanol and deionized water to prepare the catalyst ink, which contained the same weight of Nafion ionomer as the catalyst. The ink was then subjected to a sonication for 20 min. The well-dispersed ink was brushed on a piece of carbon paper ( $5 \text{ cm}^2$ ) as cathode with loading of  $\sim 3 \text{ mg} \cdot \text{cm}^{-2}$ , followed by a drying in vacuum at  $80 \text{ }^\circ\text{C}$  for 2 h. As for anode, Pt/C (20 wt. % of Pt, BASF) was used with loading of  $\sim 0.35 \text{ mg} \cdot \text{cm}^{-2}$ . The prepared cathode and anode were pressed onto the two sides of a Nafion 211 membrane (DuPont) at  $130 \text{ }^\circ\text{C}$  for 90 seconds under a pressure of 1.5 MPa to obtain the MEA. The MEA was measured by a fuel cell test station (Scribner 850e) with UHP-grade  $\text{H}_2$  and  $\text{O}_2$  at  $80 \text{ }^\circ\text{C}$ . All the gases were humidified at  $80 \text{ }^\circ\text{C}$  with the flow rate of  $0.3 \text{ L} \cdot \text{min}^{-1}$  for  $\text{H}_2$  and  $0.4 \text{ L} \cdot \text{min}^{-1}$  for  $\text{O}_2$ . The absolute pressures of  $\text{H}_2$  and  $\text{O}_2$  were the same and set at 2 bar. The flow rate for the durability test was reduced to  $0.1 \text{ L} \cdot \text{min}^{-1}$  for both gases.

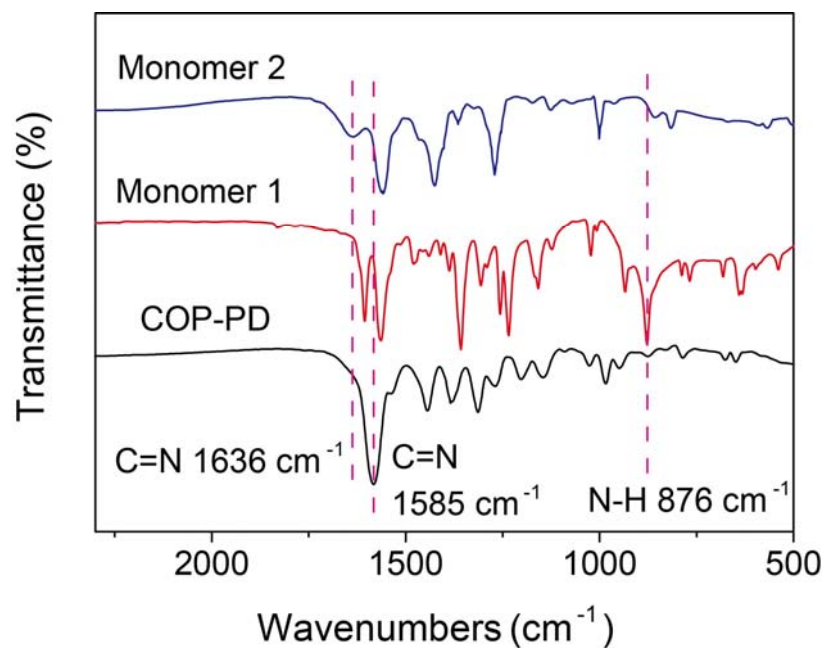

**Figure S1.** The FT-IR spectra of COP-PD. Monomer 1 is piperazine, monomer 2 is 2,6-Dichloro purine. The characteristic peaks at  $1636 \text{ cm}^{-1}$  in monomer 1 and  $1585 \text{ cm}^{-1}$  in COP-PD both represent the stretching vibration of C=N and the skeleton vibration of the benzene ring.

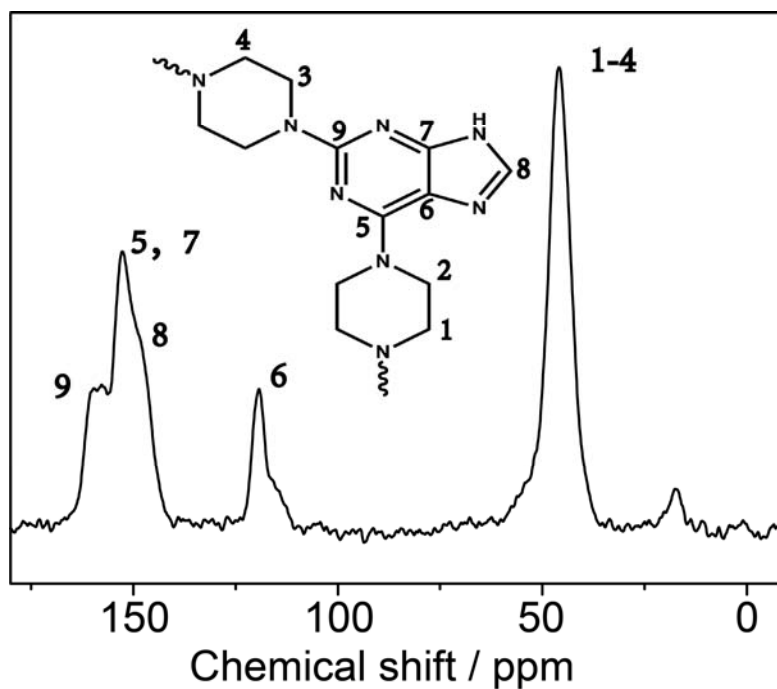

**Figure S2.** Solid-state  $^{13}\text{C}$  CP MAS NMR spectra of COP-PD.

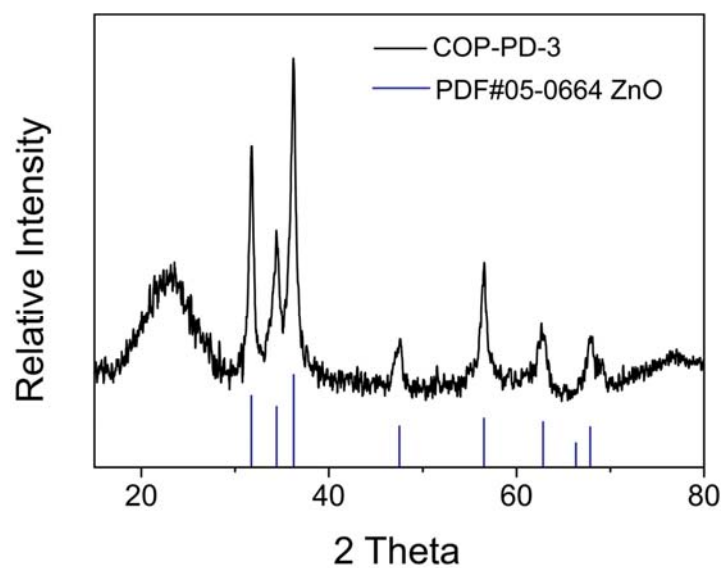

Figure S3. XRD patterns of COP-PD-3

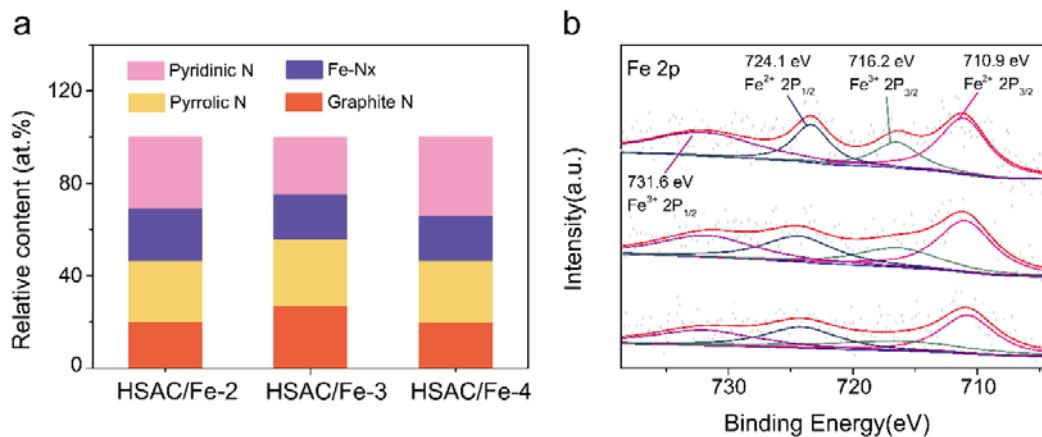

Figure S4. a) The relative contents of different types of N from high resolution XPS spectra of N1s. b) High resolution XPS spectra of Fe2p.

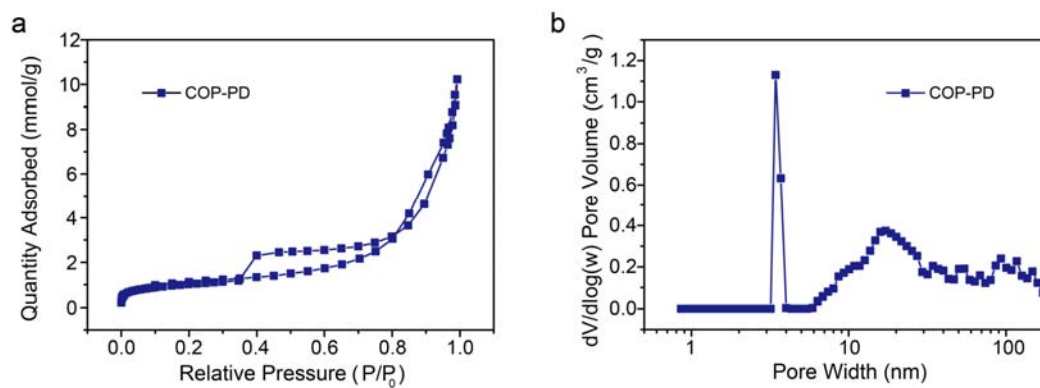

**Figure S5.** BET characterization of COP-Fe-Zn. a) nitrogen adsorption-desorption isotherms. b) The corresponding pore size distributions.

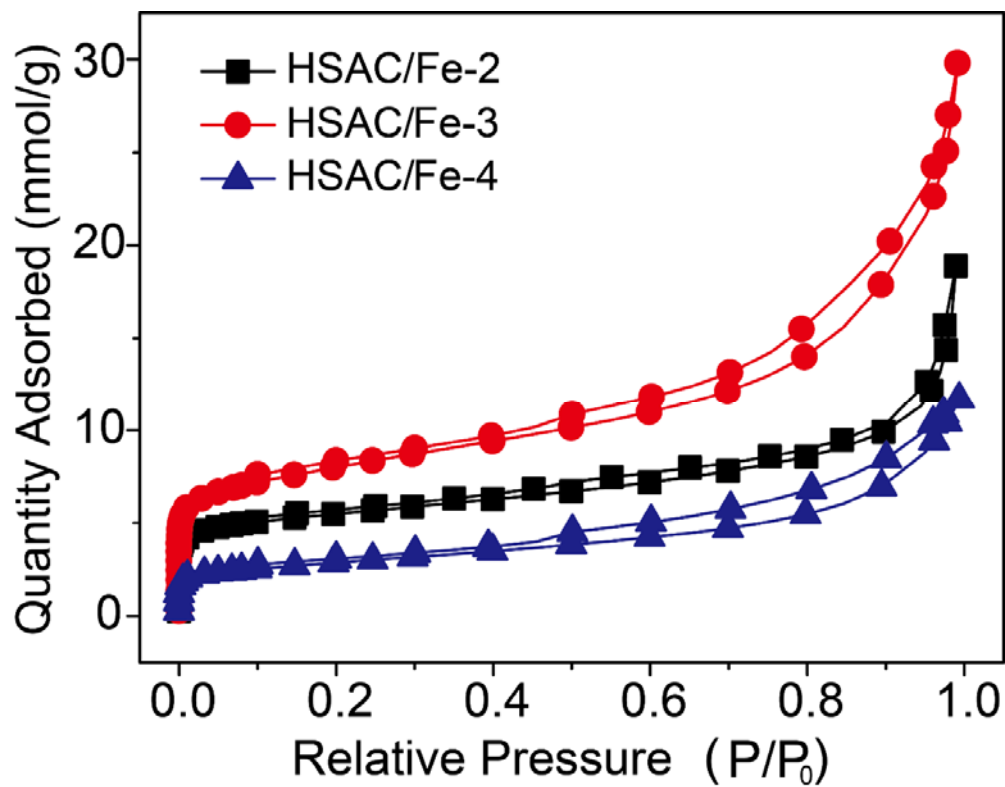

**Figure S6.** BET characterization, nitrogen adsorption-desorption isotherms.

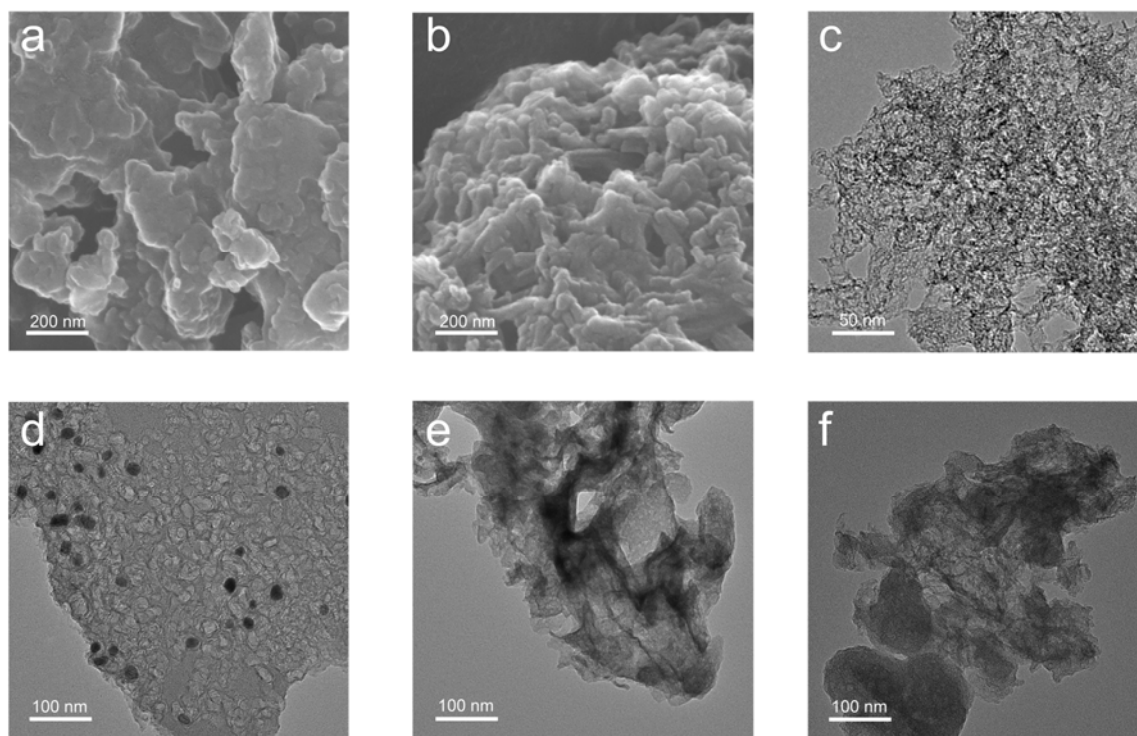

**Figure S7.** SEM image of a) COP-PD and b) HSAC/Fe-3. c) HRTEM image of HSAC/Fe-3. TEM image of d) HSAC/Fe-0, e) HSAC/Fe-2 and f) HSAC/Fe-4.

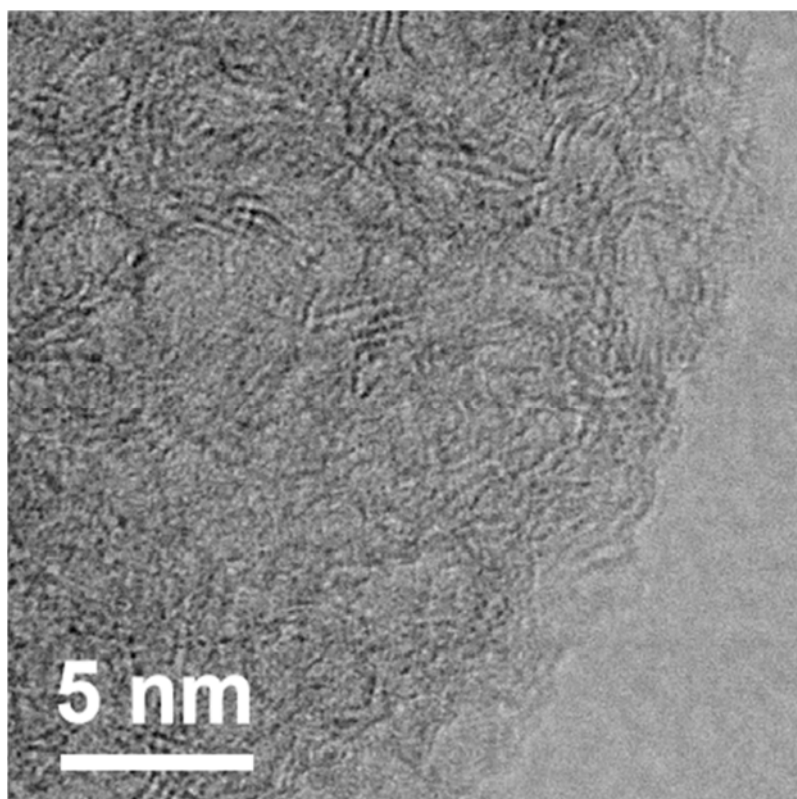



Figure S8. ABF-STEM image

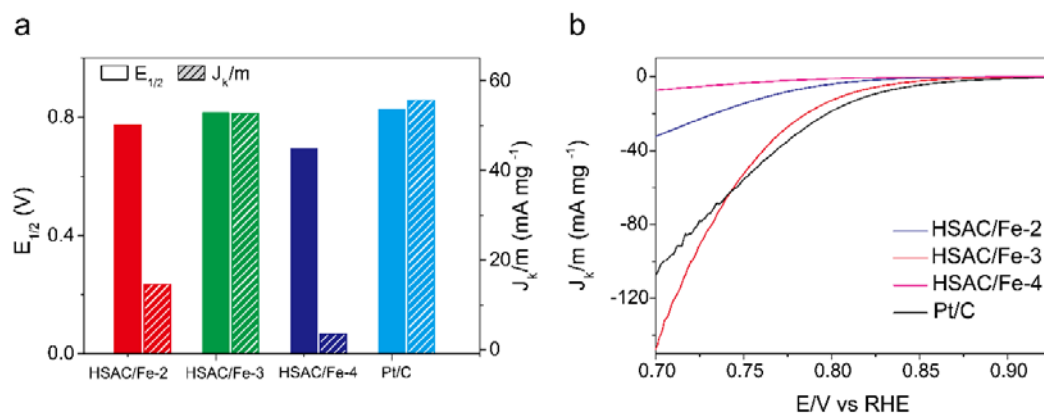

Figure S9. a)  $E_{1/2}$  and mass activity at 0.75 V, b) mass activity curves of HSAC/Fe-2, HSAC/Fe-3, HSAC/Fe-4 and Pt/C.

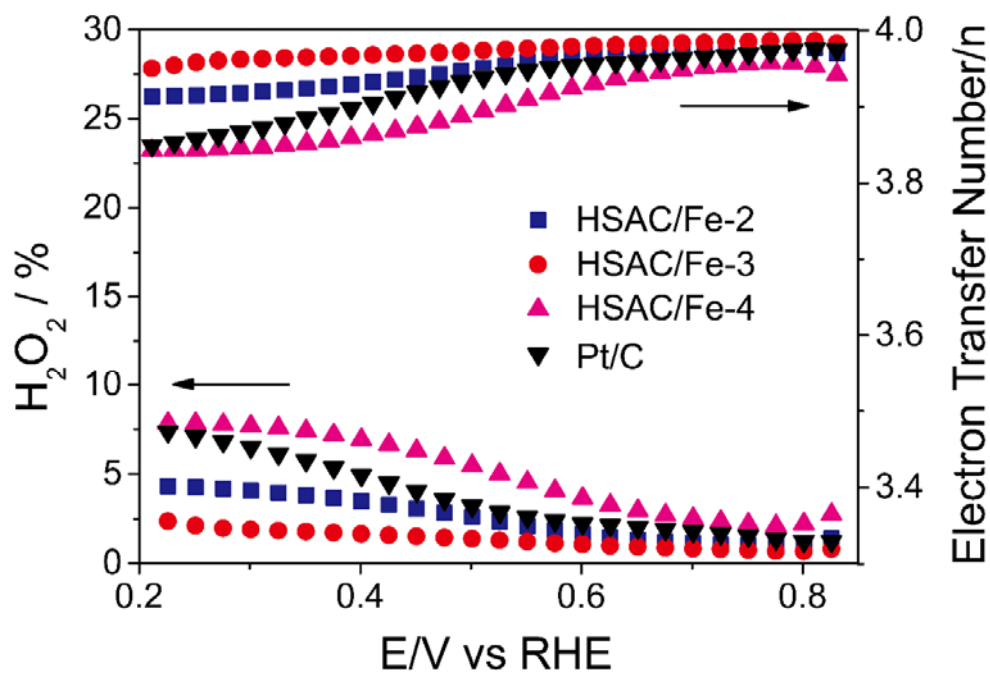

Figure S10. Peroxide yields and electron transfer numbers

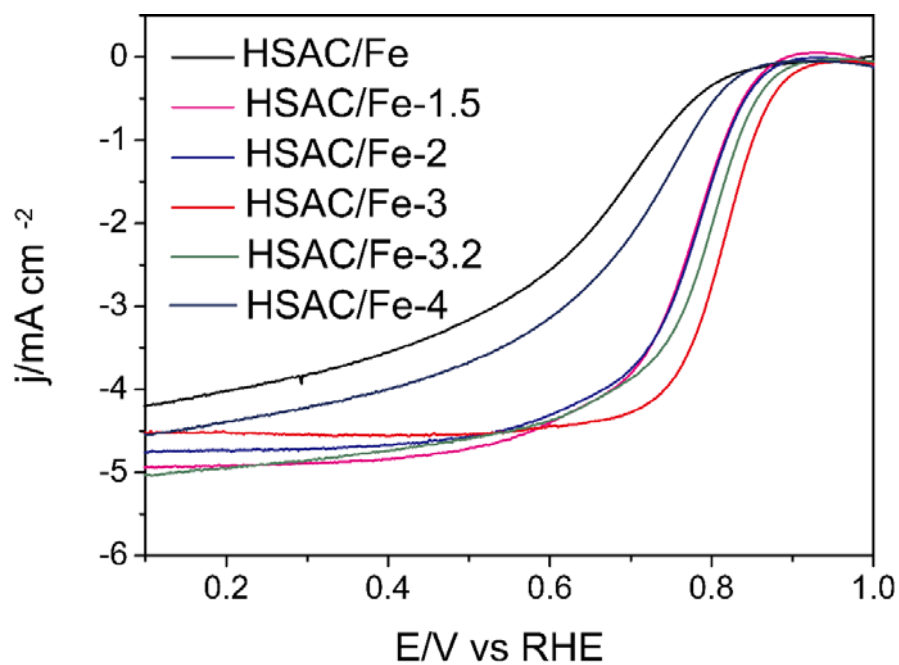

**Figure S11.** ORR polarization curves of catalysts with different Zn doping in  $\text{O}_2$ -saturated 0.5 M  $\text{H}_2\text{SO}_4$  solution at a rotation rate of 1600 rpm.

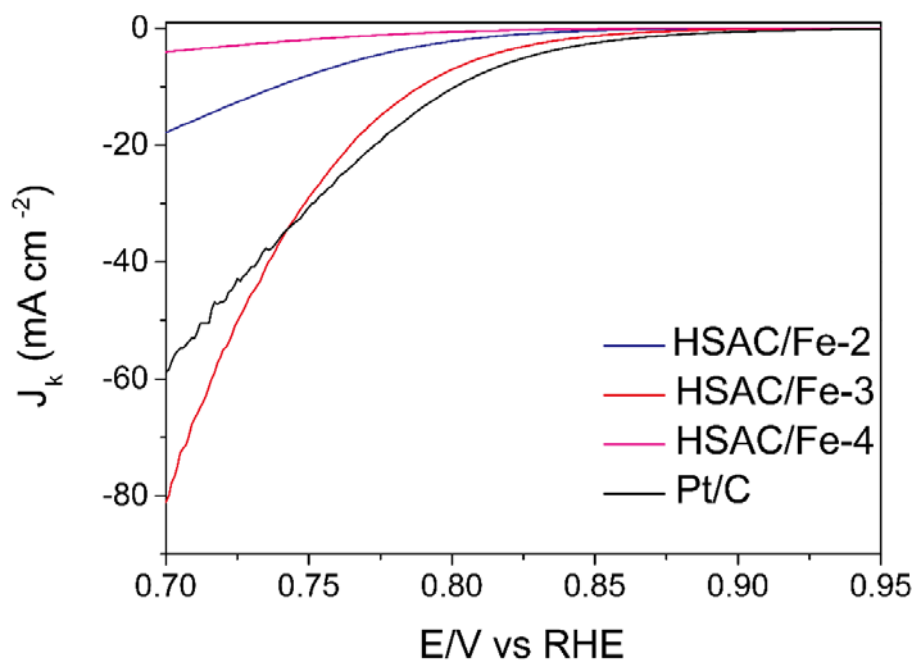

**Figure S12.**  $J_k$  for different catalyst

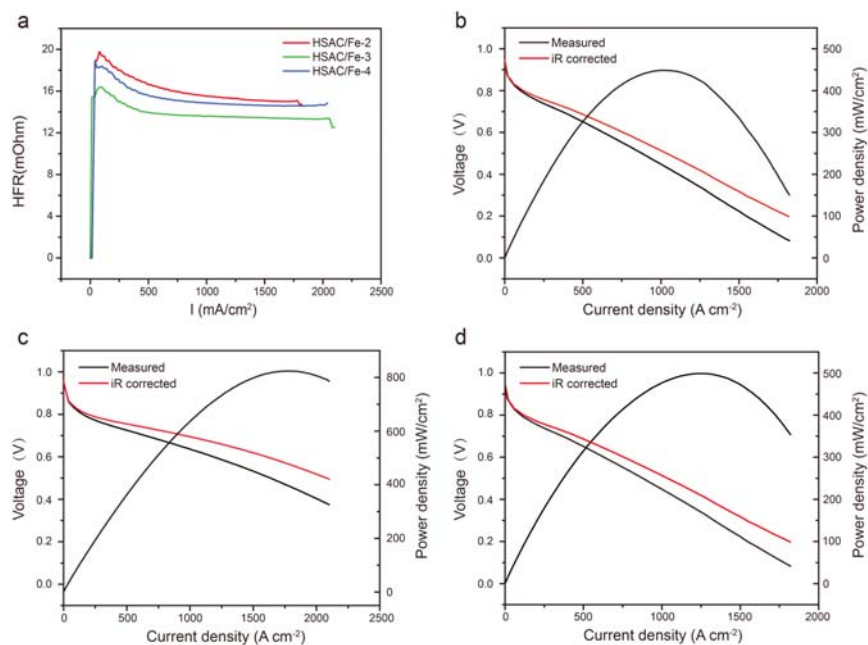

**Figure S13.** a) The HFR polarization for the three MEA. The iR-corrected polarization for the catalyst b) HSAC/Fe-2, c) HSAC/Fe-3 and d) HSAC/Fe-4, respectively.

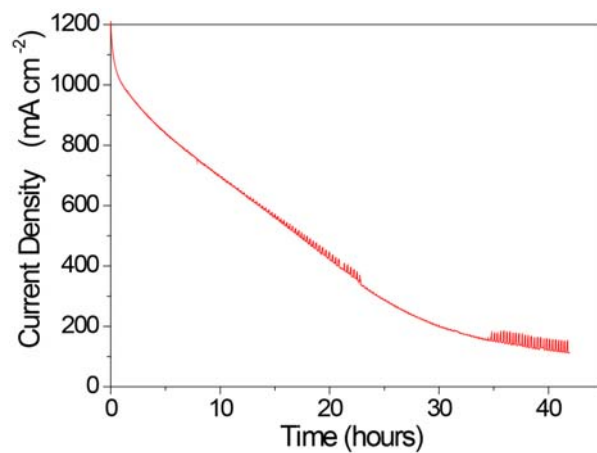

**Figure S14.** The stability of catalyst HSAC/Fe-3 in PEMFC.

**Table S1.** Surface elemental composition of catalysts determined by XPS.

| Samples   | C% (at/wt)  | N% (at/wt) | O% (at/wt) | Fe% (at/wt) |
|-----------|-------------|------------|------------|-------------|
| HSAC/Fe-2 | 90.93/87.68 | 2.01/2.26  | 6.75/8.67  | 0.31/1.39   |
| HSAC/Fe-3 | 89.09/85.45 | 1.93/2.16  | 8.69/11.10 | 0.29/1.29   |
| HSAC/Fe-4 | 89.69/86.31 | 4.92/5.52  | 5.01/6.42  | 0.39/1.75   |

**Table S2.** Iron and zinc contents determined by ICP-OES

| Samples   | Fe wt% | Zn wt% |
|-----------|--------|--------|
| HSAC/Fe-2 | 3.29   | 1.96   |
| HSAC/Fe-3 | 2.78   | 1.92   |
| HSAC/Fe-4 | 3.37   | 2.58   |

**Table S3.** Specific surface area of different pore sizes in catalysts

| Catalyst  | $S_{mic}/$<br>$m^2 g^{-1}$ | $S_{mes}/$<br>$m^2 g^{-1}$ | $S_{mac}/$<br>$m^2 g^{-1}$ | $S_{mes}+S_{mac}/$<br>$m^2 g^{-1}$ | $S_{mic}/S_{total},$<br>% | $S_{mes}/S_{total},$<br>% | $S_{total}/$<br>$m^2 g^{-1}$ |
|-----------|----------------------------|----------------------------|----------------------------|------------------------------------|---------------------------|---------------------------|------------------------------|
| HSAC/Fe-2 | 195.94                     | 157.73                     | 53.99                      | 211.72                             | 48.1                      | 38.7                      | 407.66                       |
| HSAC/Fe-3 | 209.57                     | 297.67                     | 99.49                      | 397.16                             | 34.5                      | 49.1                      | 606.73                       |
| HSAC/Fe-4 | 55.90                      | 130.87                     | 35.07                      | 165.94                             | 25.2                      | 59.0                      | 221.84                       |

$S_{mic}$ : specific surface area of micropore;  $S_{mes}$ : specific surface area of mesopores;  $S_{mac}$ : specific surface area of macropore;

**Table S4.** Fe K-edge EXAFS curves Fitting Parameters

| Sample    | Path    | N | R(A) | $\sigma^2(\times 10^{-3} \text{ \AA}^2)$ | $\Delta E_0(\text{eV})$ | R-factor |
|-----------|---------|---|------|------------------------------------------|-------------------------|----------|
| HSAC/Fe-3 | Fe-N(O) | 5 | 2.01 | 1.33                                     | 5.5                     | 0.012    |

N, coordination number; R, distance between absorber and backscatter atoms;  $\sigma^2$ , the Debye-Waller factor value;  $\Delta E_0$  (eV), inner potential correction to account for the difference in the inner potential between the sample and the reference compound. R factor is used to value the goodness of the fitting.

**Table S5.** Comparison of ORR activities of various nonprecious catalysts in 0.5 M H<sub>2</sub>SO<sub>4</sub> electrolyte.

| <b>Catalysts</b>                   | <b>Half-wave potential<br/>(V vs RHE)</b> | <b>Onset potential<br/>(V vs. RHE)</b> | <b>Rotation<br/>(rpm)</b> | <b>Ref.</b> |
|------------------------------------|-------------------------------------------|----------------------------------------|---------------------------|-------------|
| Fe <sub>2</sub> -Z <sub>8</sub> -C | 0.805                                     | 0.902                                  | 1600                      | [1]         |
| 1.5Fe-ZIF                          | 0.88                                      | /                                      | 900                       | [2]         |
| 20Mn-NC-second                     | 0.8                                       | /                                      | 900                       | [3]         |
| Fe/SNC                             | 0.77                                      | <0.9                                   | 1600                      | [4]         |
| Fe-PANI-EN-<br>hydrogel            | 0.83                                      | 0.95                                   | 900                       | [5]         |
| Co-NPs/HNCS                        | 0.773                                     | ~0.88                                  | 1600                      | [6]         |
| Fe-ZIF(50 nm)                      | 0.85                                      | ~0.96                                  | 900                       | [7]         |
| 26AMP-ex                           | 0.75                                      | ~0.88                                  | 1600                      | [8]         |
| 5% Fe-N/C                          | 0.735                                     | 0.861                                  | 1600                      | [9]         |
| Fe-N-CC                            | 0.52                                      | 0.8                                    | 1600                      | [10]        |
| HCS-A                              | ~0.75                                     | ~0.85                                  | 900                       | [11]        |
| Fe-N-C-Phen-PANI                   | 0.8                                       | ~0.9                                   | 900                       | [12]        |
| Fe-N/C NNs                         | 0.662                                     | 0.858                                  | 1600                      | [13]        |
| Co-N-C@F127                        | 0.84                                      | /                                      | 900                       | [14]        |
| FeNC                               | 0.75                                      | ~0.86                                  | 1600                      | [15]        |
| Fe-N-C/VA-CNT                      | 0.79                                      | 0.97                                   | 1600                      | [16]        |

|                  |       |      |      |           |
|------------------|-------|------|------|-----------|
| Co-N-GA          | 0.73  | 0.88 | 900  | [17]      |
| Co-N-C@F127      | 0.8   | 0.93 | 900  | [18]      |
| <b>HSAC/Fe-3</b> | 0.814 | 0.94 | 1600 | This work |

**Table S6.** Comparison of Power density of various catalysts in PEMFC.

| <b>Catalysts</b>   | <b>Power density</b>      | <b>Ref</b> |
|--------------------|---------------------------|------------|
| CoNC-ArNH3         | 826 mW cm <sup>-2</sup>   | [19]       |
| SA-Fe/NG           | 823 mW cm <sup>-2</sup>   | [20]       |
| ZIF'-FA-CNT-p      | 820 mW cm <sup>-2</sup>   | [21]       |
| Pt3Sc/PECNTs       | 760 mW cm <sup>-2</sup>   | [22]       |
| Fe2(1.5%)–N–C2-900 | 540 mW cm <sup>-2</sup>   | [23]       |
| C-FeHZ8@g-C3N4-950 | 628 mW cm <sup>-2</sup>   | [24]       |
| Octahedral PtNi/C  | 881.6 mW cm <sup>-2</sup> | [25]       |
| Pt/TNTS-Mo         | 520 mW cm <sup>-2</sup>   | [26]       |
| Pd@Pt3Co/C         | 854 mW cm <sup>-2</sup>   | [27]       |
| <b>HSAC/Fe-3</b>   | 824 mW cm <sup>-2</sup>   | This work  |

## References

- [1] Q. Liu, X. Liu, L. Zheng and J. Shui, *Angew. Chem. Int. Ed.* **2018**, *57*, 1204.
- [2] H. Zhang, H. T. Chung, D. A. Cullen, S. Wagner, U. I. Kramm, K. L. More, P. Zelenay and G. Wu, *Energ. Environ. Sci.* **2019**, *12*, 2548.
- [3] J. Li, M. Chen, D. A. Cullen, S. Hwang, M. Wang, B. Li, K. Liu, S. Karakalos, M. Lucero, H. Zhang, C. Lei, H. Xu, G. E. Sterbinsky, Z. Feng, D. Su, K. L. More, G. Wang, Z. Wang and G. Wu, *Nat. Catal.* **2018**, *1*, 935.
- [4] H. Shen, E. Gracia-Espino, J. Ma, K. Zang, J. Luo, L. Wang, S. Gao, X. Mamat, G. Hu, T. Wagberg and S. Guo, *Angew. Chem. Int. Ed.* **2017**, *56*, 13800.
- [5] Z. Qiao, H. Zhang, S. Karakalos, S. Hwang, J. Xue, M. Chen, D. Su and G. Wu, *Appl. Catal. B-Environ.*, **2017**, *219*, 629.
- [6] Y. Han, Y. G. Wang, W. Chen, R. Xu, L. Zheng, J. Zhang, J. Luo, R. A. Shen, Y. Zhu, W. C. Cheong, C. Chen, Q. Peng, D. Wang and Y. Li, *J. Am. Chem. Soc.* **2017**, *139*, 17269.
- [7] H. Zhang, S. Hwang, M. Wang, Z. Feng, S. Karakalos, L. Luo, Z. Qiao, X. Xie, C. Wang, D. Su, Y. Shao and G. Wu, *J. Am. Chem. Soc.* **2017**, *139*, 14143.
- [8] Y. Chen, R. Gokhale, A. Serov, K. Artyushkova and P. Atanassov, *Nano Energy* **2017**, *38*, 201.
- [9] Q. Lai, L. Zheng, Y. Liang, J. He, J. Zhao and J. Chen, *ACS Catal.* **2017**, *7*, 1655.
- [10] G. A. Ferrero, K. Preuss, A. Marinovic, A. B. Jorge, N. Mansor, D. J. Brett, A. B. Fuertes, M. Sevilla and M. M. Titirici, *ACS Nano* **2016**, *10*, 5922.
- [11] P. Xu, J. Zhang, G. Jiang, F. Hassan, J.-Y. Choi, X. Fu, P. Zamani, L. Yang, D. Banham, S. Ye and Z. Chen, *Nano Energy* **2018**, *51*, 745.
- [12] X. Fu, P. Zamani, J. Y. Choi, F. M. Hassan, G. Jiang, D. C. Higgins, Y. Zhang, M. A. Hoque and Z. Chen, *Adv Mater* **2017**, *29*, 1604456.



- [13] N. Wu, Y. Wang, Y. Lei, B. Wang, C. Han, Y. Gou, Q. Shi and D. Fang, *Sci. Rep.* **2015**, *5*, 17396.
- [14] Y. He, S. Hwang, D. A. Cullen, M. A. Uddin, L. Langhorst, B. Li, S. Karakalos, A. J. Kropf, E. C. Wegener, J. Sokolowski, M. Chen, D. Myers, D. Su, K. L. More, G. Wang, S. Litster and G. Wu, *Energ. Environ. Sci.* **2019**, *12*, 250.
- [15] K. Mamtani, D. Jain, A. C. Co and U. S. Ozkan, *Energy & Fuels* **2017**, *31*, 6541.
- [16] S. Yasuda, A. Furuya, Y. Uchibori, J. Kim and K. Murakoshi, *Adv. Funct. Mater.* **2016**, *26*, 738.
- [17] X. Fu, J. Y. Choi, P. Zamani, G. Jiang, M. A. Hoque, F. M. Hassan and Z. Chen, *ACS Appl. Mater. Inter.* **2016**, *8*, 6488.
- [18] X. X. Wang, D. A. Cullen, Y. T. Pan, S. Hwang, M. Wang, Z. Feng, J. Wang, M. H. Engelhard, H. Zhang, Y. He, Y. Shao, D. Su, K. L. More, J. S. Spendelow and G. Wu, *Adv. Mater.* **2018**, *30*.
- [19] L. Chen, X. Liu, L. Zheng, Y. Li, X. Guo, X. Wan, Q. Liu, J. Shang, J. Shui, *Appl. Catal. B Environ.* **2019**, *256*, 117849.
- [20] L. Yang, D. Cheng, H. Xu, X. Zeng, X. Wan, J. Shuic, Z. Xiang, D. Cao, *P. Natl. A. Sci.* **2018**, *26*, 6626.
- [21] C. Zhang, Y. C. Wang, B. An, R. Huang, C. Wang, Z. Zhou, W. Lin, *Adv. Mater.* **2017**, *29*.
- [22] M. S. Garapati, R. Sundara, *Int. J. Hydrogen Energ.* **2019**, *44*, 10951.
- [23] L. Li, S. Shen, G. Wei, X. Li, K. Yang, Q. Feng, J. Zhang, *ACS Appl. Mater. Interfaces* **2019**, *11*, 14126.
- [24] Y. Deng, B. Chi, X. Tian, Z. Cui, E. Liu, Q. Jia, W. Fan, G. Wang, D. Dang, M. Li, K. Zang, J. Luo, Y. Hu, S. Liao, X. Sun, S. Mukerjee, *J. Mater. Chem. A* **2019**, *7*, 5020.
- [25] B. Li, J. Wang, X. Gao, C. Qin, D. Yang, H. Lv, Q. Xiao, C. Zhang, *Nano Res.* **2018**, *12*, 281.

[26] R. Alipour Moghadam Esfahani, L. M. Rivera Gavidia, G. García, E. Pastor, S. Specchia, *Renew. Energ.* **2018**, *120*, 209.

[27] K.C. Wang, H.C. Huang, C.H. Wang, *Int. J. Hydrogen Energ.* **2017**, *42*, 11771
